# Supplementary material for: Structure, catalysis, chitin transport, and selective inhibition of chitin synthase
Source: Springer Nature journal article supplement (doi:10.1038/s41467-023-40479-4), 2023-08-08
Supplement: MOESM1 [file 41467_2023_40479_MOESM1_ESM.pdf]

## Supplementary information

**Supplementary Table 1. Cryo-EM data collection, refinement, and validation.**

| Sample                                                 | <i>S. cerevisiae</i> Chs1         |               |                                   |                                   |                                      |                                   |                                   |                                   |
|--------------------------------------------------------|-----------------------------------|---------------|-----------------------------------|-----------------------------------|--------------------------------------|-----------------------------------|-----------------------------------|-----------------------------------|
| Incubated with                                         | -                                 | <i>GlcNAc</i> | <i>UDP-GlcNAc</i><br>5min         | <i>UDP-GlcNAc</i><br>40 min       | <i>UDP-GlcNAc</i><br>+ <i>GlcNAc</i> | <i>UDP</i>                        | <i>PolyB</i>                      | <i>NikkoZ</i>                     |
| State                                                  | <i>Apo</i>                        | <i>Apo</i>    | <i>UDP-GlcNAc</i>                 | <i>UDP+GlcNAc</i>                 | <i>UDP-GlcNAc</i><br>+ <i>GlcNAc</i> | <i>UDP</i>                        | <i>PolyB</i>                      | <i>NikkoZ</i>                     |
| Map and Model                                          | EMD-3<br>6856,<br>PDB ID:<br>8K3Q | EMD-3<br>6857 | EMD-3<br>6862,<br>PDB ID:<br>8K3V | EMD-3<br>6861,<br>PDB ID:<br>8K3U | EMD-3<br>6863,<br>PDB ID:<br>8K3W    | EMD-3<br>6859,<br>PDB ID:<br>8K3T | EMD-3<br>6855,<br>PDB ID:<br>8K3P | EMD-3<br>6864,<br>PDB ID:<br>8K3X |
| <b>Data collection and processing</b>                  |                                   |               |                                   |                                   |                                      |                                   |                                   |                                   |
| Microscope                                             | FEI Titan Krios                   |               |                                   |                                   |                                      |                                   |                                   |                                   |
| Voltage (kV)                                           | 300                               |               |                                   |                                   |                                      |                                   |                                   |                                   |
| Electron exposure<br>(e <sup>-</sup> /Å <sup>2</sup> ) | 50                                |               |                                   |                                   |                                      |                                   |                                   |                                   |
| Defocus range<br>(-μm)                                 | 1.0-2.0                           |               |                                   |                                   |                                      |                                   |                                   |                                   |
| Pixel size (Å)                                         | 1.06                              | 1.06          | 1.06                              | 1.06                              | 1.06                                 | 1.06                              | 1.06                              | 1.06                              |
| Micrographs (no.)                                      | 1914                              | 1564          | 3045                              | 2469                              | 1356                                 | 632                               | 2311                              | 2711                              |
| Initial particle<br>images (no.)                       | 2,704,5<br>16                     | 1,077,6<br>54 | 3,784 ,<br>484                    | 1,059,4<br>72                     | 1,920,4<br>16                        | 431,54<br>6                       | 2,508,1<br>53                     | 4,135,7<br>34                     |
| Final particle<br>images (no.)                         | 416,53<br>6                       | 218,69<br>8   | 250,34<br>6                       | 184,44<br>9                       | 107,25<br>9                          | 115,77<br>3                       | 142,88<br>7                       | 837,01<br>5                       |
| Symmetry<br>imposed                                    | C2                                | C2            | C2                                | C2                                | C2                                   | C2                                | C2                                | C2                                |
| Map resolution<br>(Å)                                  | 2.60                              | 3.51          | 3.10                              | 3.06                              | 2.91                                 | 3.57                              | 3.64                              | 2.44                              |
| FSC threshold                                          | 0.143                             | 0.143         | 0.143                             | 0.143                             | 0.143                                | 0.143                             | 0.143                             | 0.143                             |
| Map resolution<br>range (Å)                            | 250 -<br>2.60                     | 250 -<br>3.51 | 250 -<br>3.10                     | 250 -<br>3.06                     | 250 -<br>2.91                        | 250 -<br>3.57                     | 250 -<br>3.64                     | 250 -<br>2.44                     |
| <b>Refinement</b>                                      |                                   |               |                                   |                                   |                                      |                                   |                                   |                                   |
| Map sharpening<br><i>B</i> factor (Å <sup>2</sup> )    | 102.5                             | 161.9         | 120.1                             | 129.1                             | 91.8                                 | 151.2                             | 155.5                             | 107.4                             |
| Model<br>composition                                   |                                   |               |                                   |                                   |                                      |                                   |                                   |                                   |
| Nonhydrogen<br>atoms                                   | 12340                             | -             | 11862                             | 11070                             | 11892                                | 11834                             | 11852                             | 11838                             |
| Protein<br>residues                                    | 1504                              |               | 1438                              | 1334                              | 1438                                 | 1438                              | 1438                              | 1436                              |
| R.m.s. deviations                                      |                                   |               |                                   |                                   |                                      |                                   |                                   |                                   |

|                     |       |   |       |       |       |       |       |       |
|---------------------|-------|---|-------|-------|-------|-------|-------|-------|
| Bond lengths (Å)    | 0.01  | - | 0.01  | 0.01  | 0.01  | 0.01  | 0.01  | 0.01  |
| Bond angles (°)     | 0.83  |   | 0.70  | 0.74  | 0.66  | 0.86  | 0.77  | 0.91  |
| Validation          |       |   |       |       |       |       |       |       |
| MolProbity score    | 1.85  | - | 1.93  | 2.00  | 1.75  | 2.50  | 2.30  | 1.80  |
| Clash score         | 8.4   |   | 8.5   | 16.7  | 8.15  | 16.0  | 12.9  | 7.6   |
| Poor rotamers (%)   | 0.2   |   | 0.2   | 0.0   | 0.2   | 0.2   | 0.2   | 0.2   |
| FSC(model-map) =0.5 | 2.9   |   | 3.3   | 3.7   | 3.2   | 3.9   | 3.9   | 2.8   |
| Ramachandran plot   |       |   |       |       |       |       |       |       |
| Favored (%)         | 96.22 | - | 95.42 | 96.04 | 95.56 | 95.42 | 94.78 | 94.42 |
| Allowed (%)         | 3.78  |   | 4.58  | 3.96  | 4.44  | 4.58  | 5.22  | 5.58  |
| Disallowed (%)      | 0     |   | 0     | 0     | 0     | 0     | 0     | 0     |

**Supplementary Table 2. Primer sequences for generating Chs1 FLAG tagging and mutations.**

|                 | Forward primer ( 5'→3' )                                                             | Reverse primer ( 5'→3' )                                                            |
|-----------------|--------------------------------------------------------------------------------------|-------------------------------------------------------------------------------------|
| FLAG-tag        | GAATTCGATATCAAGCTTATCAT<br>GAGTGATCAAAATAATCGATCG<br>AGAAATG                         | GACTCGAGGTCGACGGTATCGCG<br>AAATGTAACCTTTTTAAAAACCTT<br>ACTATCATG                    |
| Chs1Δ           | CGAAGAGTCACTAAATTAATACT<br>GGGAAGCCAAACCAAAAAAAGT<br>ATACAGACATGGAGGCCAGAA<br>TACCCT | ATGATAGTAAACACATATACTTATTT<br>ATAACAAAGGGGTAATCAATCTACC<br>AGTATAGCGACCAGCATTACATAC |
| ΔN              | GGAATTCGATATCAAGCATGGG<br>TGTACCTGCATCATCCTCGGTG<br>TC                               | CATGCTTGATATCGAATTCCTGCAG<br>C                                                      |
| N456A/<br>E457A | GCTGCTGACCATATCCTGTTAG<br>GAAGAACTTTGAAAGG                                           | CTAACAGGATATGGTCAGCAGCAT<br>ACATTGTGACTACTAGCATCAATTC<br>CGT                        |
| K578A           | AGAGCAAAATCAGAAAGCTATT<br>AACTCACATAGATGGGCATTTG                                     | AGCTTTCTGATTTTGCTCTTTCAA<br>CAAAACAAAAGTTG                                          |
| D602A           | ATATCGTTACATTGTTAGCTGCT<br>GGTACCATGCCAG                                             | AGCTAACAAATGTAACGATATTGGGA<br>CGCA                                                  |
| S657N/<br>N658F | TTCGAATACAAAATGTTTTTCAT<br>TTTAGACAAAACAACCGAGTCT<br>AACTTTG                         | TGTTTTGTCTAAAATGAAAAACATT<br>TTGTATTCGAAATTCTGTGATGCAA<br>C                         |
| K662M           | ATGTCCAATATTTTAGACATGAC<br>AACCGAGTCTAACTTTGGATTTA<br>TTACTG                         | AAAGTTAGACTCGGTTGTCATGTCT<br>AAAATATTGGACATTTTGTATTG                                |
| V673S           | AACTTTGGATTATTACTTCTCT<br>ACCGGGGGCATTCTCTGC                                         | AGAGAATGCCCCCGGTAGAGAAGT<br>AATAATCCAAAGTTAGACTCGGTT<br>G                           |
| L674Q           | TTTGGATTATTACTGTTTCAGCC<br>GGGGGCATTCTCTGCGTATAG                                     | CGCAGAGAATGCCCCCGGCTGAA<br>CAGTAATAAATCCAAAGTTAGACTC<br>GG                          |
| P675L           | GGATTTATTACTGTTCTATTGGG<br>GGCATTCTCTGCGTATAGGTTT<br>G                               | ATACGCAGAGAATGCCCCCAATAG<br>AACAGTAATAAATCCAAAGTTAGAC<br>TCGG                       |
| P675T           | GGATTTATTACTGTTCTAACAGG<br>GGCATTCTCTGCGTATAGGTTT<br>G                               | ATACGCAGAGAATGCCCCTGTTAG<br>AACAGTAATAAATCCAAAGTTAGAC<br>TCGG                       |
| G676L           | TTTATTACTGTTCTACCGTTGGC<br>ATTCTCTGCGTATAGGTTTGAAG<br>CTG                            | CCTATACGCAGAGAATGCCAACGG<br>TAGAACAGTAATAAATCCAAAGTTA<br>GAC                        |
| R718L           | ATGTATCTTGCTGAAGATTTGAT<br>TTTATGCTTTGAAGTGGTCAC                                     | CACTTCAAAGCATAAAATCAAATCT<br>TCAGCAAGATACATATTGGAAG                                 |
| D745R           | AGTTCTTATGCTTCAACAAGAGT                                                              | AGGGACCCTCTCCGGTACTCTTGT                                                            |

|       |                                                               |                                                             |
|-------|---------------------------------------------------------------|-------------------------------------------------------------|
|       | ACCGGAGAGGGTCCCTGAATTT<br>ATTC                                | TGAAGCATAAGAACTTCTGCAGTAT<br>TTC                            |
| E752R | GTACCGGAGAGGGTCCCTAGA<br>TTTATTCTTCAGAGGAGGCGTT<br>GGTTGA     | CCTCCTCTGAAGAATAAATCTAGG<br>GACCCTCTCCGGTACATCTG            |
| Q756L | GTCCCTGAATTTATTCTTTTGAG<br>GAGGCGTTGGTTGAATGGTTC              | ATTCAACCAACGCCTCCTCAAAAG<br>AATAAATTCAGGGACCCTCTCCGG        |
| R759A | GCTTGGTTGAATGGTTCATTTTT<br>TGCTAG                             | AATGAACCATTCAACCAAGCCCTC<br>CTCTGAAGAATAAATTCAGG            |
| W760A | ATTCTTCAGAGGAGGCGTGCTT<br>TGAATGGTTCATTTTTTGCTAGT<br>GTATATTC | AAAAAATGAACCATTCAAAGCACG<br>CCTCCTCTGAAGAATAAATTCAGG        |
| W969A | TAATGTCCACGACTTATCAGCT<br>GGTACAAAGGGTGCAATGGCA<br>AATC       | AGCTGATAAGTCGTGGACATTACA<br>AAATGCATAG                      |
| G970A | TAATGTCCACGACTTATCAGCTA<br>CAAAGGGTGCAATGGCAAATCC             | AGCCCATGATAAGTCGTGGACATT<br>ACAAAATGC                       |
| S883F | TTTATATTCATGAGTGTCAAATC<br>CTTCCAAAATATATTG                   | TTGACACTCATGAATATAAAGCAGA<br>ATATCATGTAAATCATCATCACCGC<br>A |
| S917F | TTTCTGGGCTCCACTTATTGTTT<br>GTACC                              | AATAAGTGGAGCCCAGAAAGATAA<br>CAATATCCCTGAAAGCTTCTGTGG<br>T   |
| ΔSL   | GAGCCATCTTATGATGAAAAAAA<br>GACTGGC                            | TTTTTCATCATAAGATGGCTCTGCAC<br>CCTTTGTACCCCATGATAAG          |

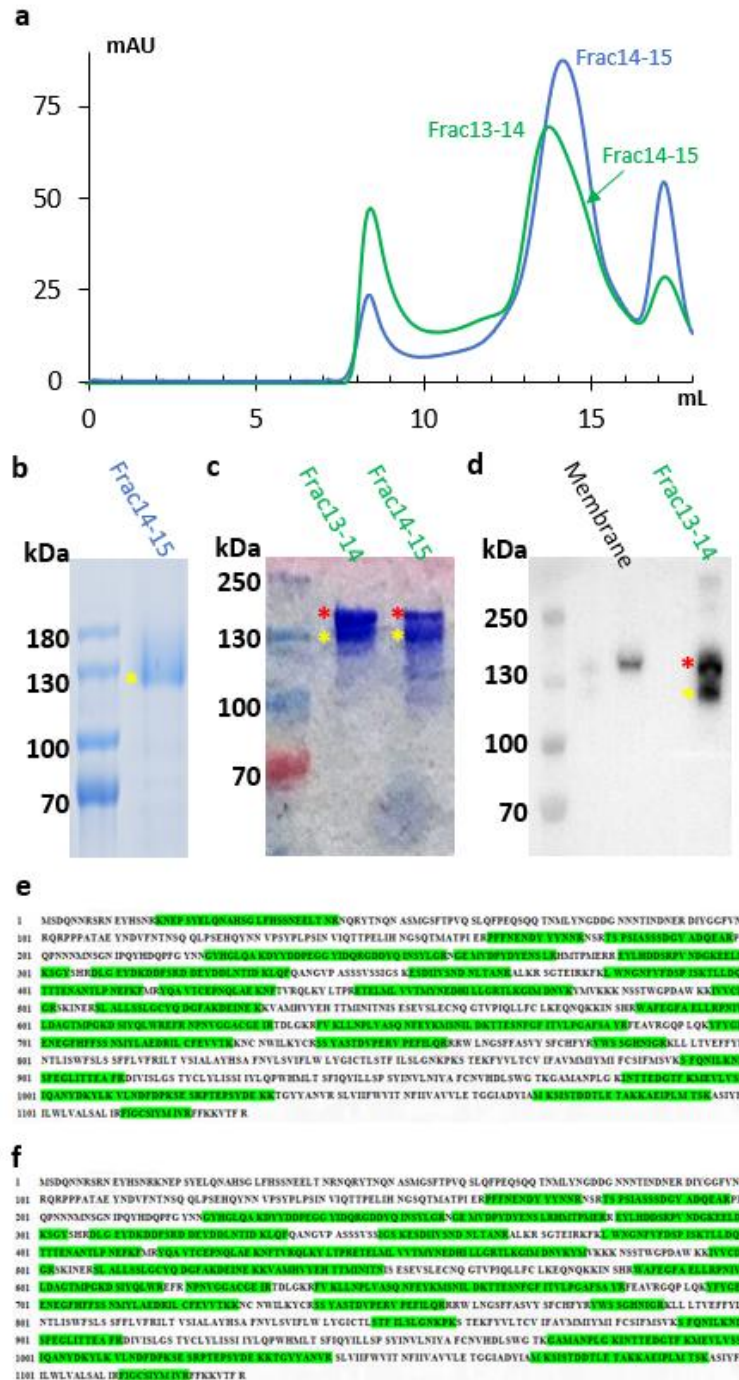

**Supplementary Figure 1. Purification and analysis of Chs1.** **a)** Gel filtration profile of Chs1. Sample purified with regular procedure was shown in blue, while sample purified with excess protease inhibitor in all buffers during purification was shown in green. The peak fractions were checked by Coomassie blue-stained SDS-PAGE gel (**b-c**). Two major bands locating higher or lower than 130kDa marker are highlighted by red or yellow star respectively. **d)** Western blot analysis of the cell membrane or peak fraction in (**a**). Source data of panel **b-d** are provided as a Source Data file. Three independent experiments of **b-d** were conducted with similar results. **e-f)** Tryptic digestion mass spectrometry for two bands in (**c**). The detected peptides are highlighted in green. Source data is provided as a Source Data file.

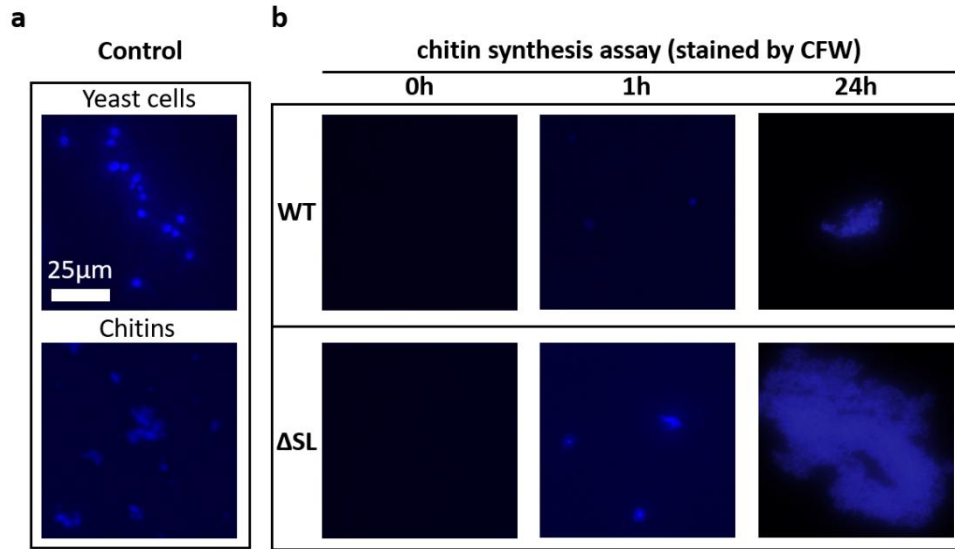

**Supplementary Figure 2. Characterization of synthesized chitin by CFW staining.** **a)** As references, cell walls of yeast cells and commercial chitins were stained using CFW. **b)** In vitro chitin synthesis assay of purified Chs1 (WT) and a swapping loop truncated Chs1 (ΔSL) at different time points (0, 1, 24 hours) by staining the product using CFW. Three independent experiments of **a-b** were conducted with similar results.

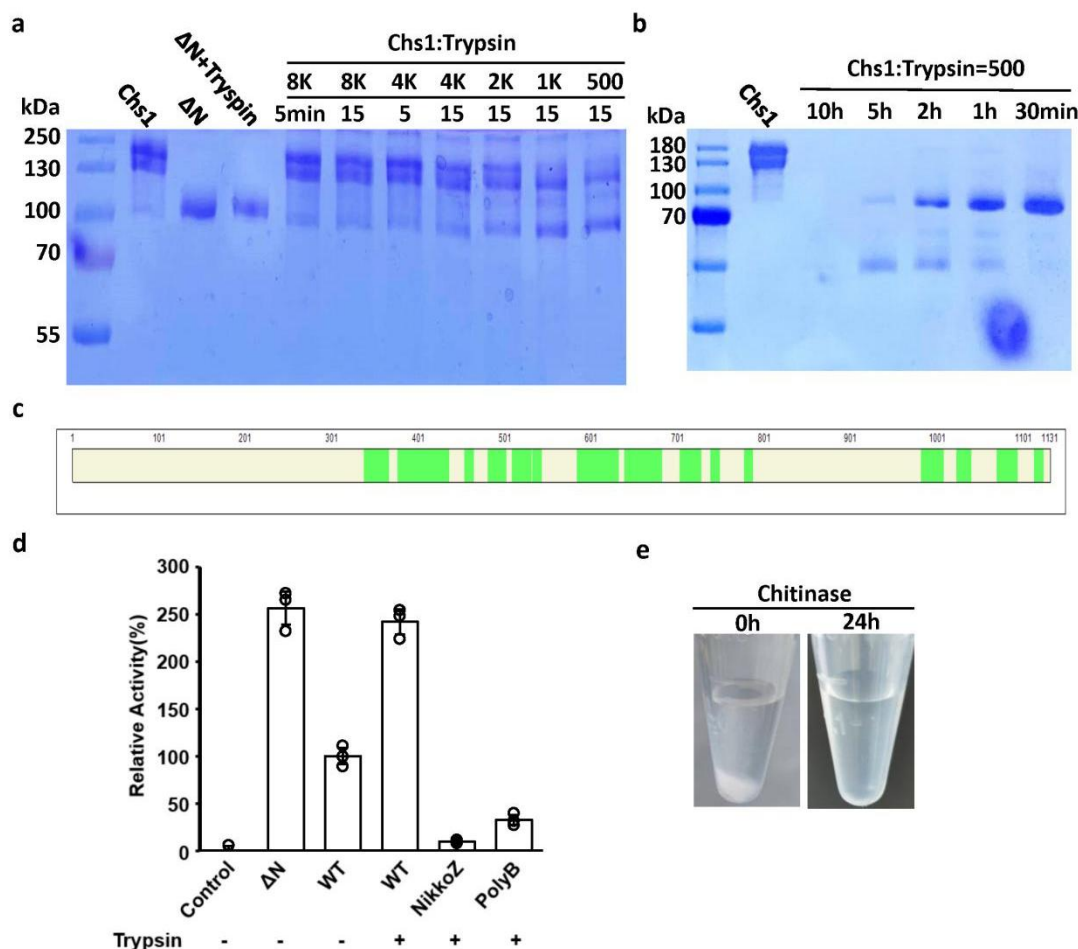

**Supplementary Figure 3. Proteolysis analysis of Chs1 by trypsin.** **a)** Purified Chs1 and a truncated Chs1 by deleting N-terminal 340 residues ( $\Delta$  N) were incubated with trypsin in different mass ratios (500:1, 1000:1, 2000:1, 4000:1, 8000:1) and times (5mins, 15mins), and then checked by Coomassie blue-stained SDS-PAGE gel. Source data is provided as a Source Data file. Three independent experiments were conducted with similar results. **b)** Equal amounts of purified Chs1 were first incubated with trypsin in mass ratios at 500:1 for different times (30mins, 1 hour, 2 hours, 5 hours or 10 hours), and then checked by Coomassie blue-stained SDS-PAGE gel. Source data is provided as a Source Data file. Three independent experiments were conducted with similar results. **c)** Tryptic digestion mass spectrometry for the proteolytic band in (**b**). The detected peptides are highlighted in green. Source data is provided as a Source Data file. **d)** In vitro UDP-Glo glycosyltransferase assay with wild type Chs1 and  $\Delta$  N in buffer with or without trypsin, NikkoZ, or PolyB. The reaction without Chs1 was used as the control. Data points represent the mean  $\pm$  SD in triplicate. **e)** Chitinase digestion of synthesized product by trypsin activated Chs1 (24h reaction). The synthesized chitin was visible as white precipitant and disappeared after 24h incubation with chitinase. Three independent experiments were conducted with similar results.



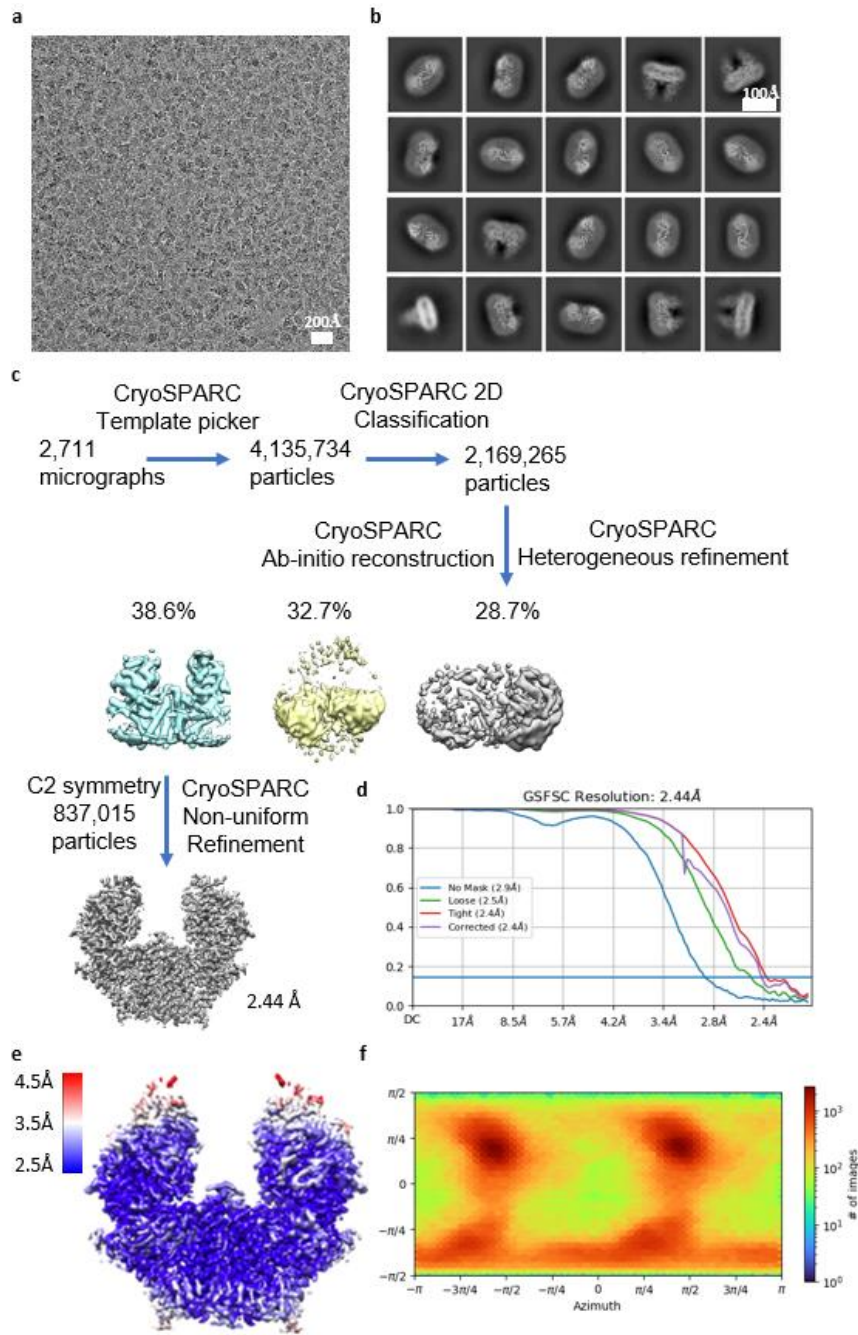

**Supplementary Figure 4. Cryo-EM analysis of Chs1 in complex with NikkoZ.** **a)** A representative electron micrograph. **b)** Selected reference-free 2D class averages. **c)** Cryo-EM data processing procedure. **d)** Gold-standard Fourier shell correlation of two independent half 3D maps of Chs1 in C2 symmetry. **e)** Local resolution map of the 2.44-Å 3D map of NikkoZ-bound Chs1 in C2 symmetry. **f)** Angular distribution of raw particles used in CryoSPARC 3D reconstruction of the NikkoZ-bound Chs1.

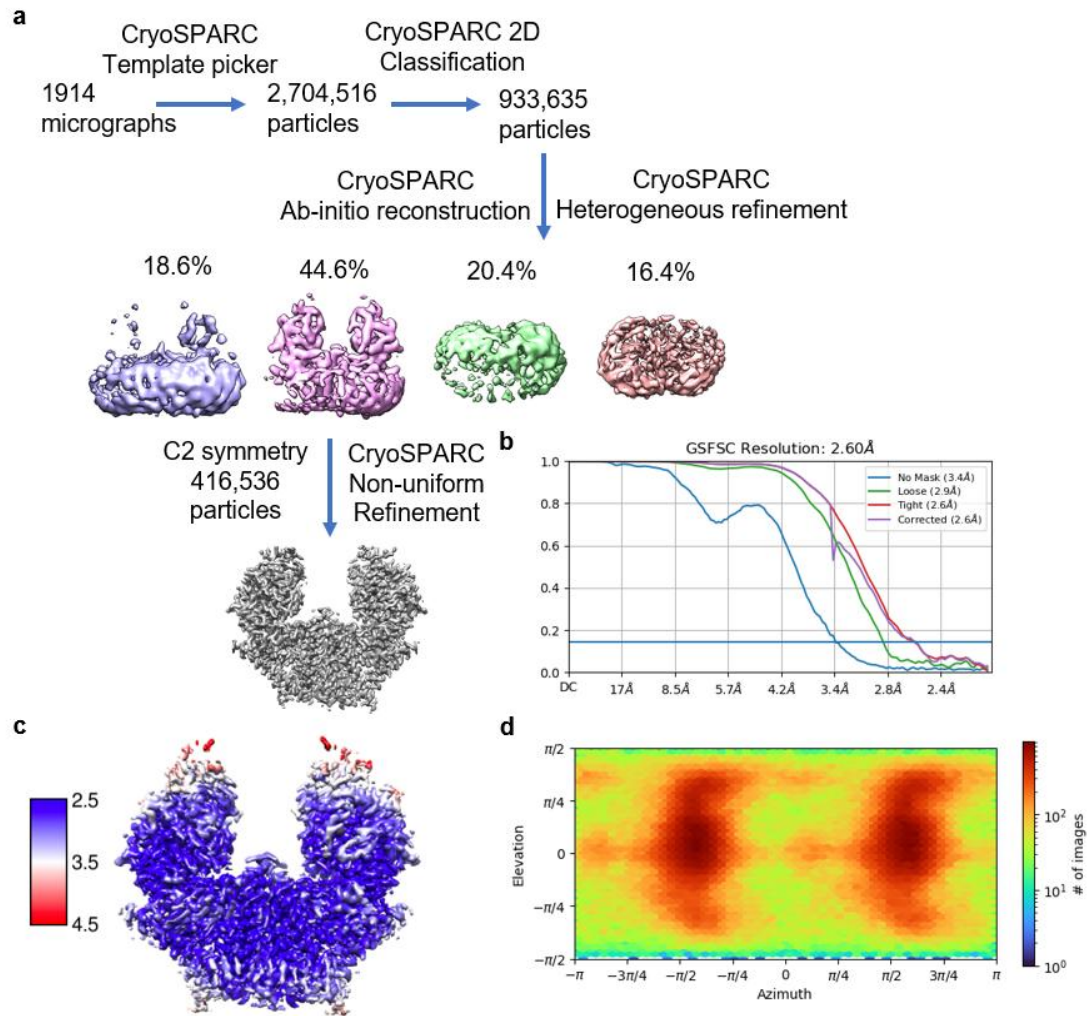

**Supplementary Figure 5. Cryo-EM data processing and resolution estimation of Chs1 in the apo state.** **a)** Cryo-EM data processing procedure. **b)** Gold-standard Fourier shell correlation of two independent half 3D maps of Chs1 in C2 symmetry. **c)** Local resolution map of the 2.60-Å 3D map of apo Chs1 in C2 symmetry. **d)** Angular distribution of raw particles used in CryoSPARC 3D reconstruction of the apo Chs1.

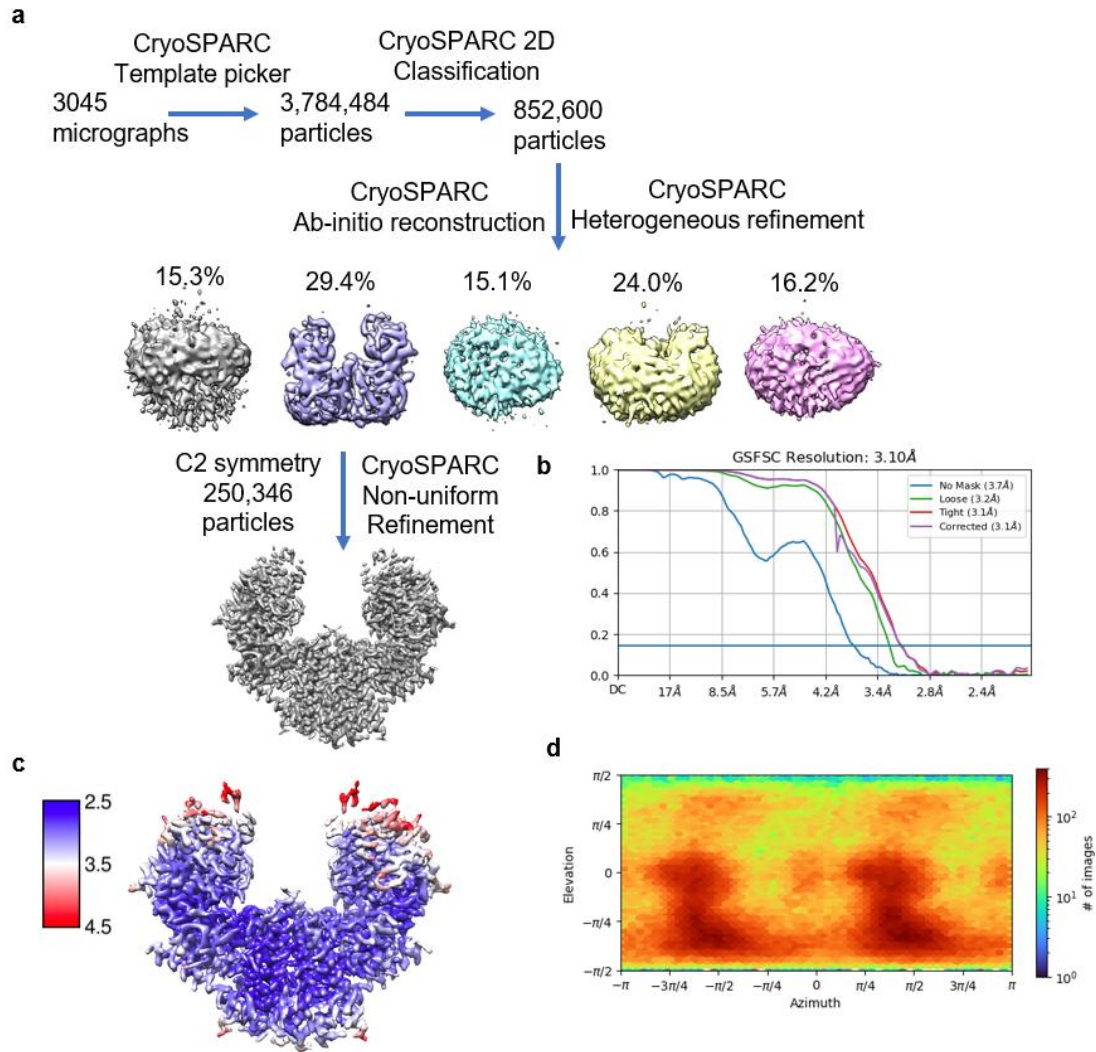

**Supplementary Figure 6. Cryo-EM data processing and resolution estimation of UDP-GlcNAc+GlcNAc bound Chs1.** **a)** Cryo-EM data processing procedure. **b)** Gold-standard Fourier shell correlation of two independent half 3D maps of Chs1 in C2 symmetry. **c)** Local resolution map of the 3.10-Å 3D map of UDP-GlcNAc+GlcNAc bound Chs1 in C2 symmetry. **d)** Angular distribution of raw particles used in CryoSPARC 3D reconstruction of UDP-GlcNAc+GlcNAc bound Chs1.

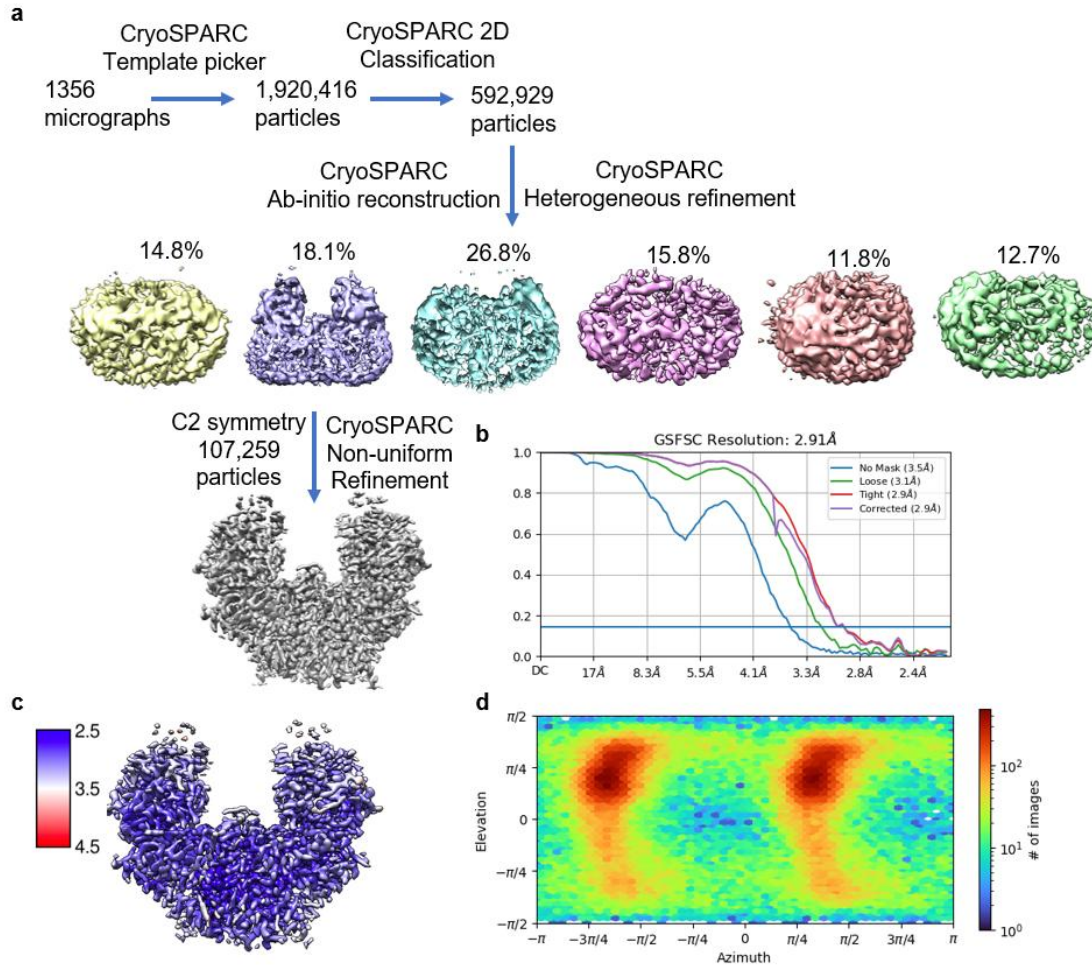

**Supplementary Figure 7. Cryo-EM data processing and resolution estimation of UDP-GlcNAc bound Chs1.** **a)** Cryo-EM data processing procedure. **b)** Gold-standard Fourier shell correlation of two independent half 3D maps of Chs1 in C2 symmetry. **c)** Local resolution map of the 2.91-Å 3D map of UDP-GlcNAc bound Chs1 in C2 symmetry. **d)** Angular distribution of raw particles used in CryoSPARC 3D reconstruction of UDP-GlcNAc-bound Chs1.



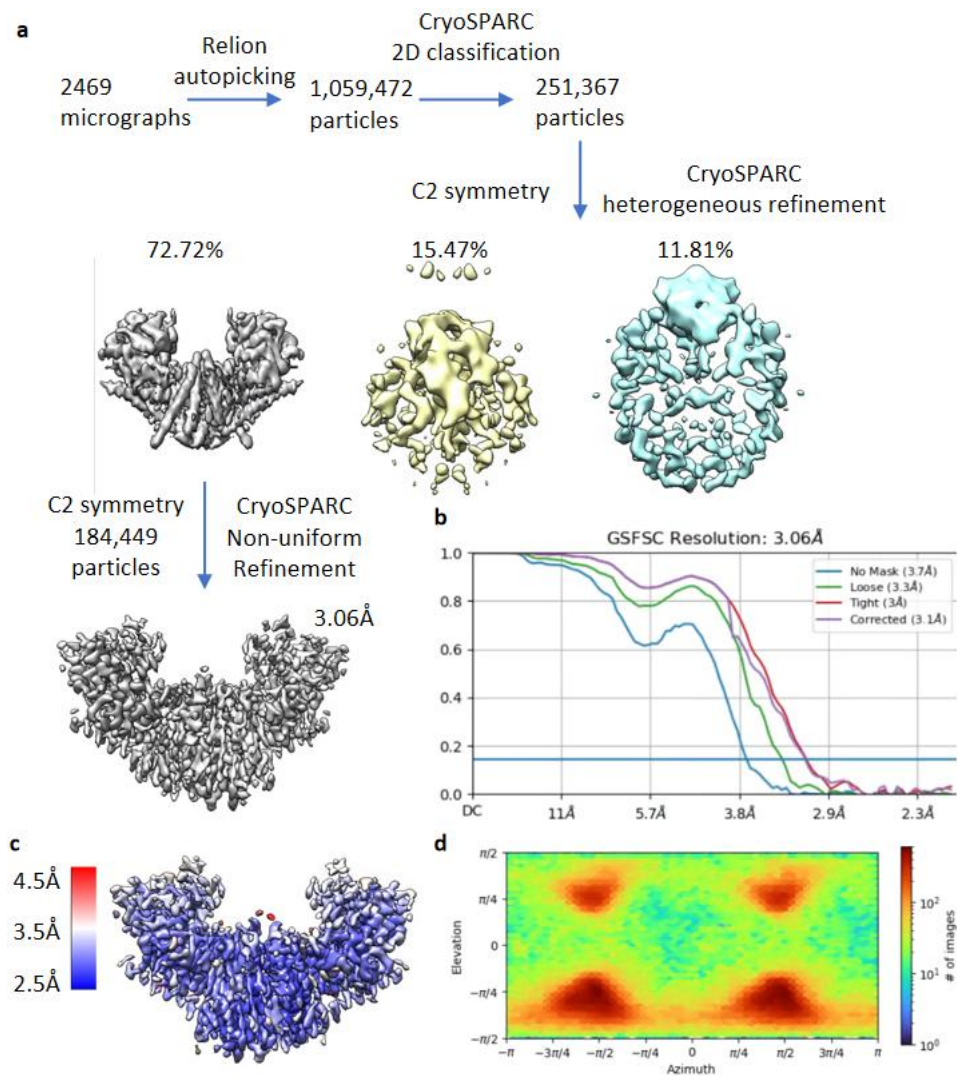

**Supplementary Figure 8. Cryo-EM data processing and resolution estimation of primed Chs1 (UDP+GlcNAc bound).** **a)** Cryo-EM data processing procedure. **b)** Gold-standard Fourier shell correlation of two independent half 3D maps of Chs1 in C2 symmetry. **c)** Local resolution map of the 3.06-Å 3D map of primed Chs1 in C2 symmetry. **d)** Angular distribution of raw particles used in CryoSPARC 3D reconstruction of the primed Chs1.

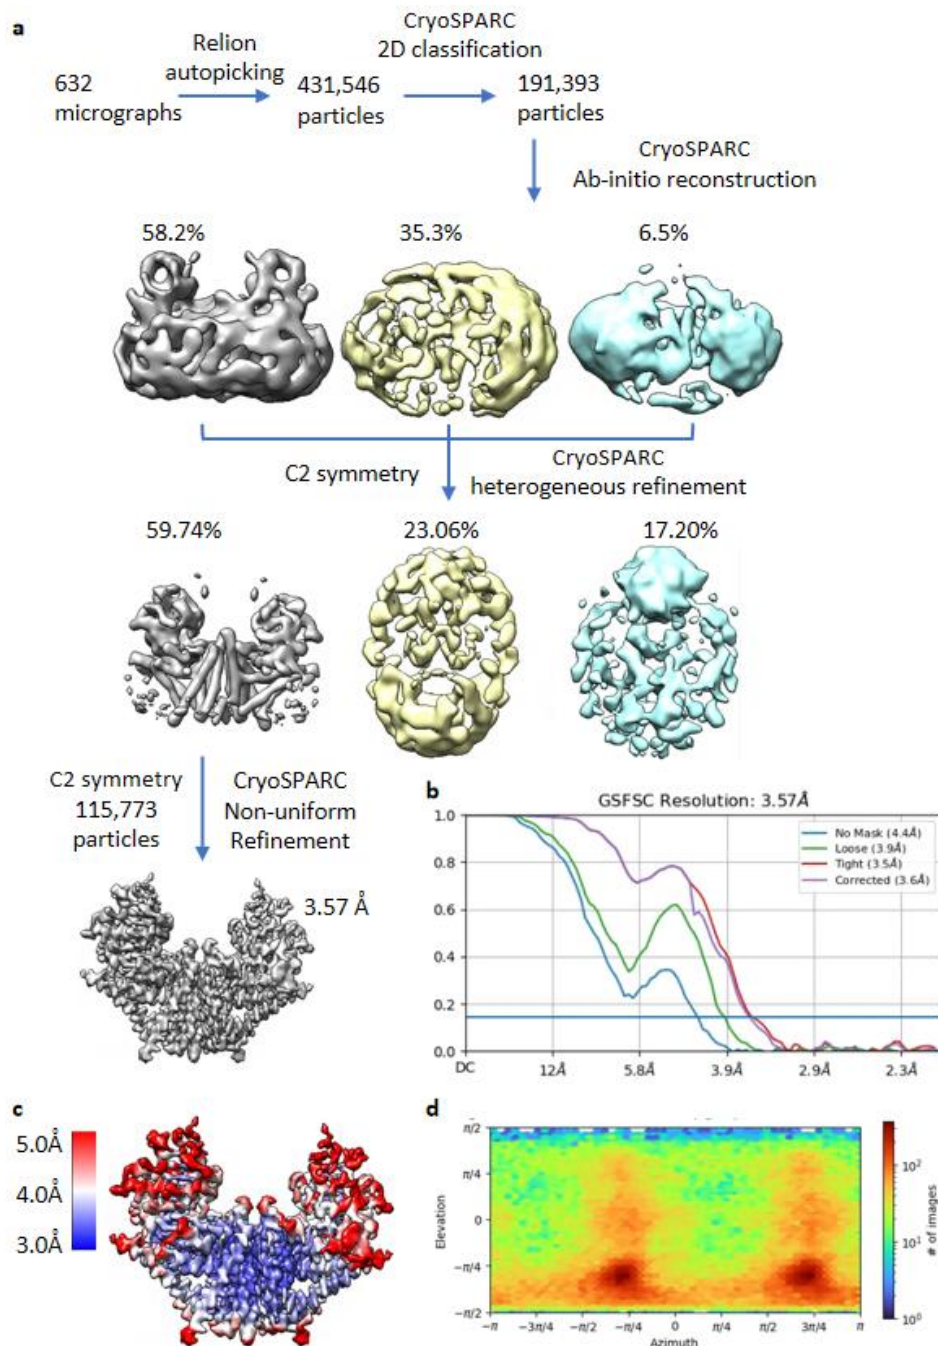

**Supplementary Figure 9. Cryo-EM data processing and resolution estimation of UDP-bound Chs1.** **a)** Cryo-EM data processing procedure. **b)** Gold-standard Fourier shell correlation of two independent half 3D maps of Chs1 in C2 symmetry. **c)** Local resolution map of the 3.57-Å 3D map of UDP-bound Chs1 in C2 symmetry. **d)** Angular distribution of raw particles used in CryoSPARC 3D reconstruction of UDP-bound Chs1.

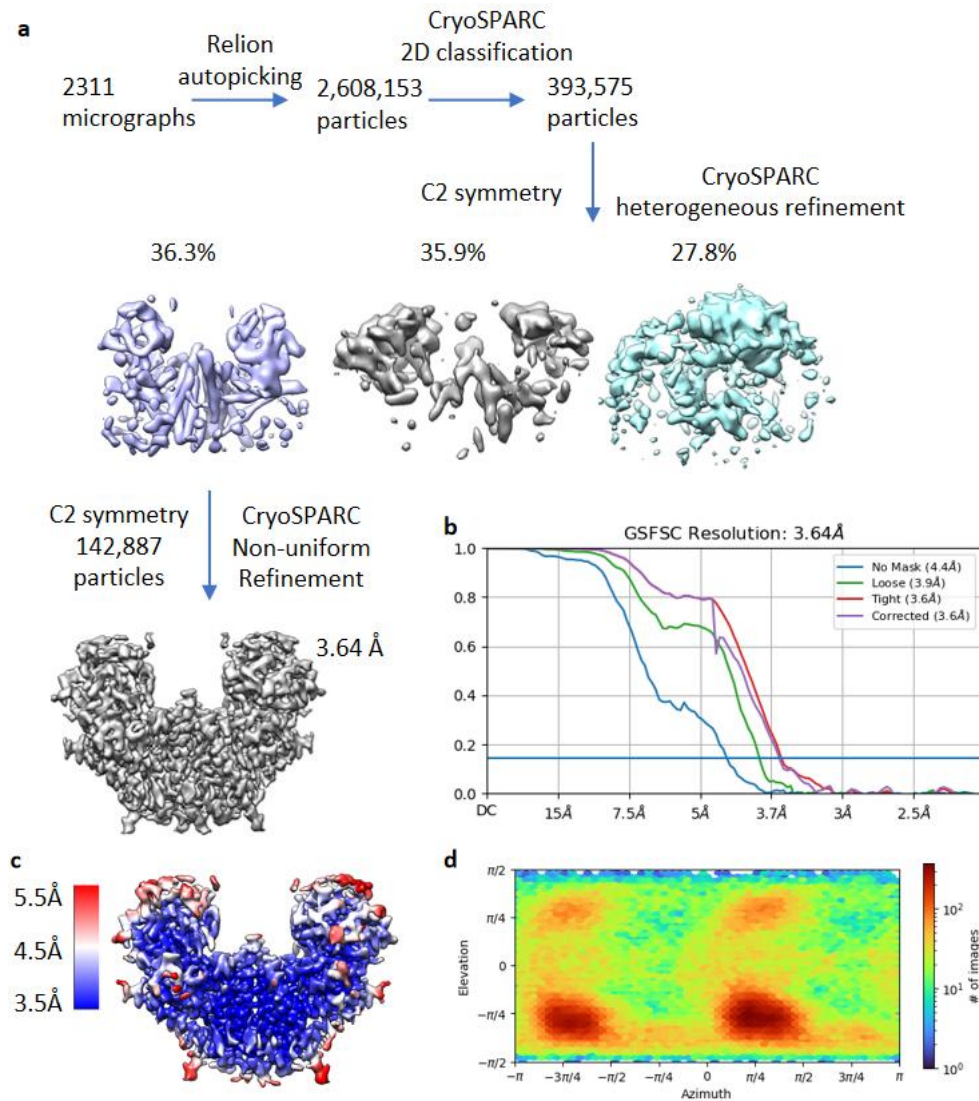

**Supplementary Figure 10. Cryo-EM data processing and resolution estimation of PolyB bound Chs1.** **a)** Cryo-EM data processing procedure. **b)** Gold-standard Fourier shell correlation of two independent half 3D maps of Chs1 in C2 symmetry. **c)** Local resolution map of the 3.64-Å 3D map of PolyB-bound Chs1 in C2 symmetry. **d)** Angular distribution of raw particles used in CryoSPARC 3D reconstruction of PolyB-bound Chs1.

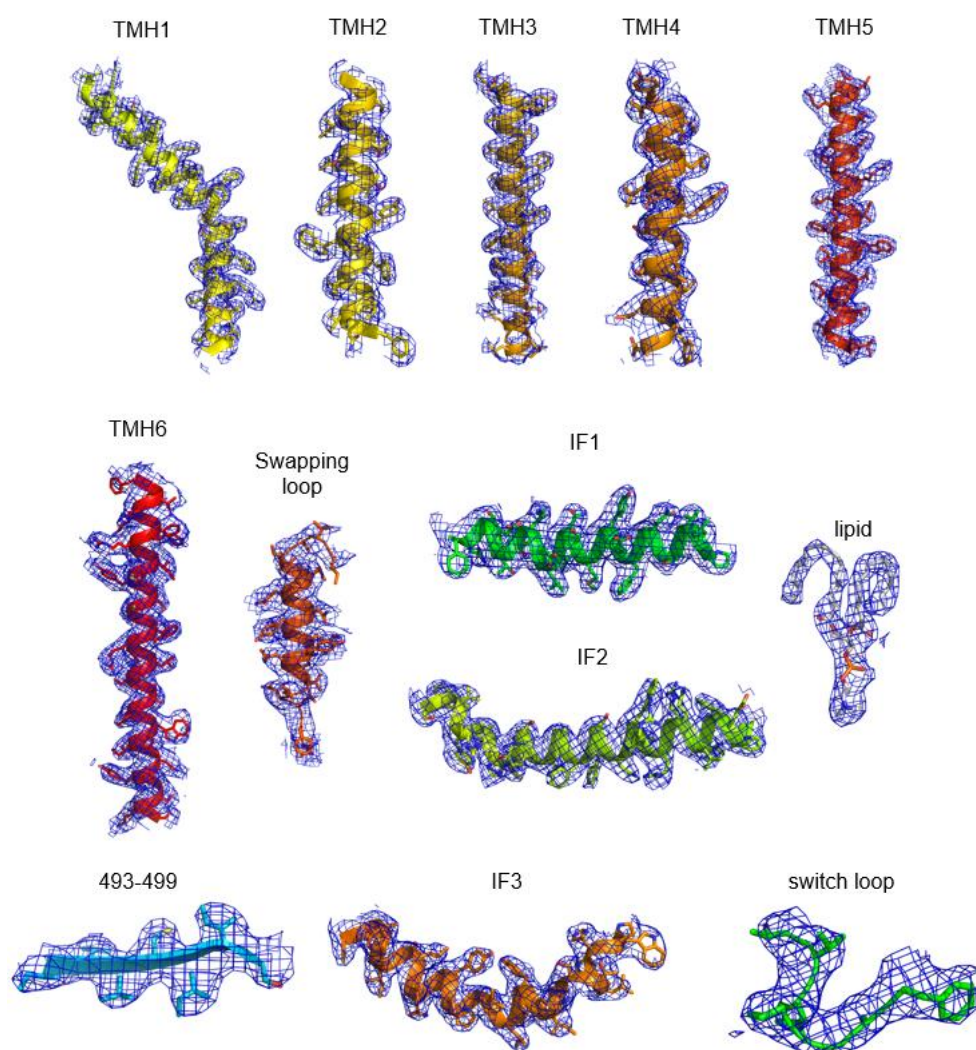

**Supplementary Figure 11.** Selected regions in the 3D map of apo Chs1 superimposed with the atomic model.



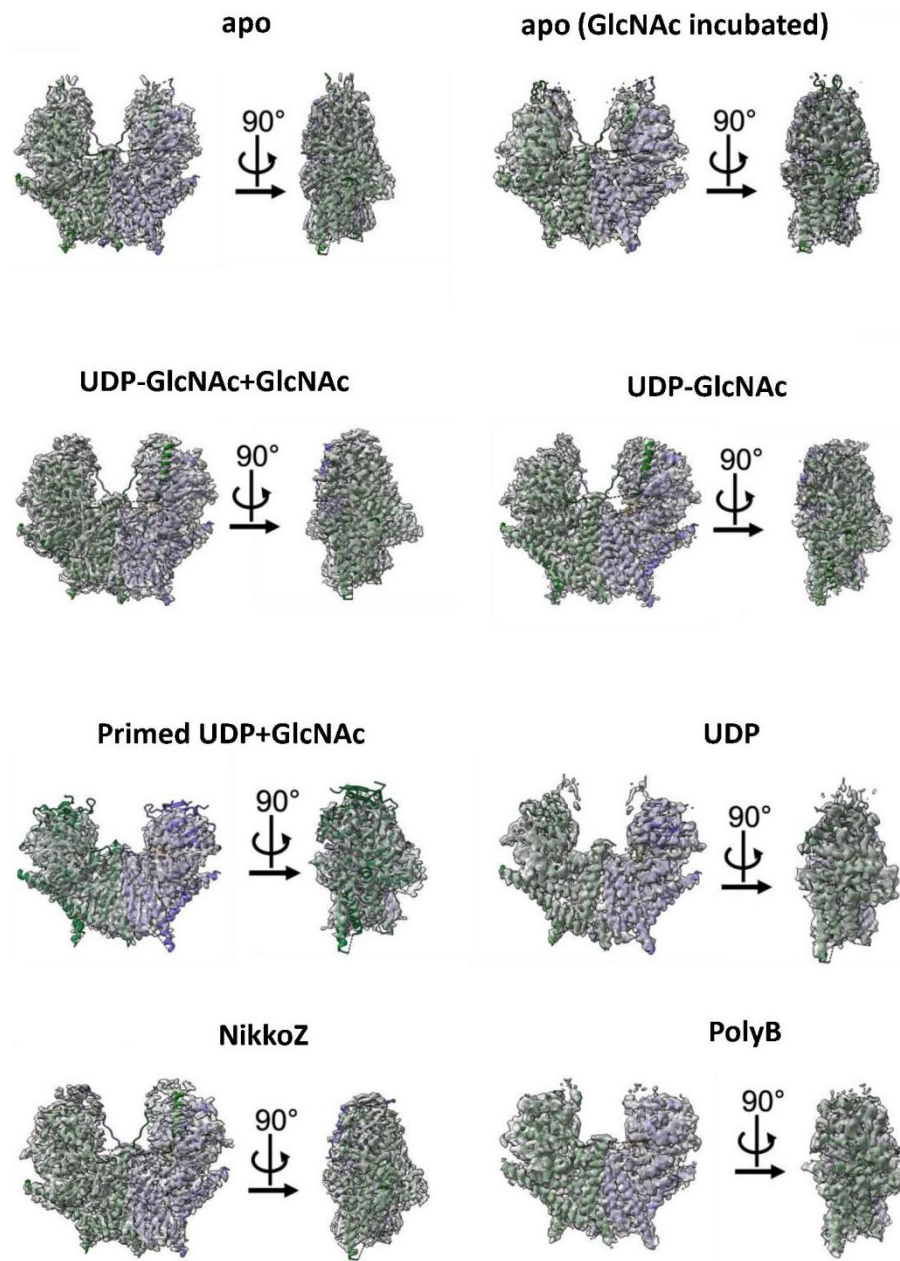

**Supplementary Figure 12. Cryo-EM maps of Chs1 in apo, apo (GlcNAc incubated), UDP-GlcNAc+GlcNAc bound, UDP-GlcNAc bound, primed UDP+GlcNAc bound, UDP bound, NikkoZ bound, and PolyB bound states superimposed with their corresponding models.**

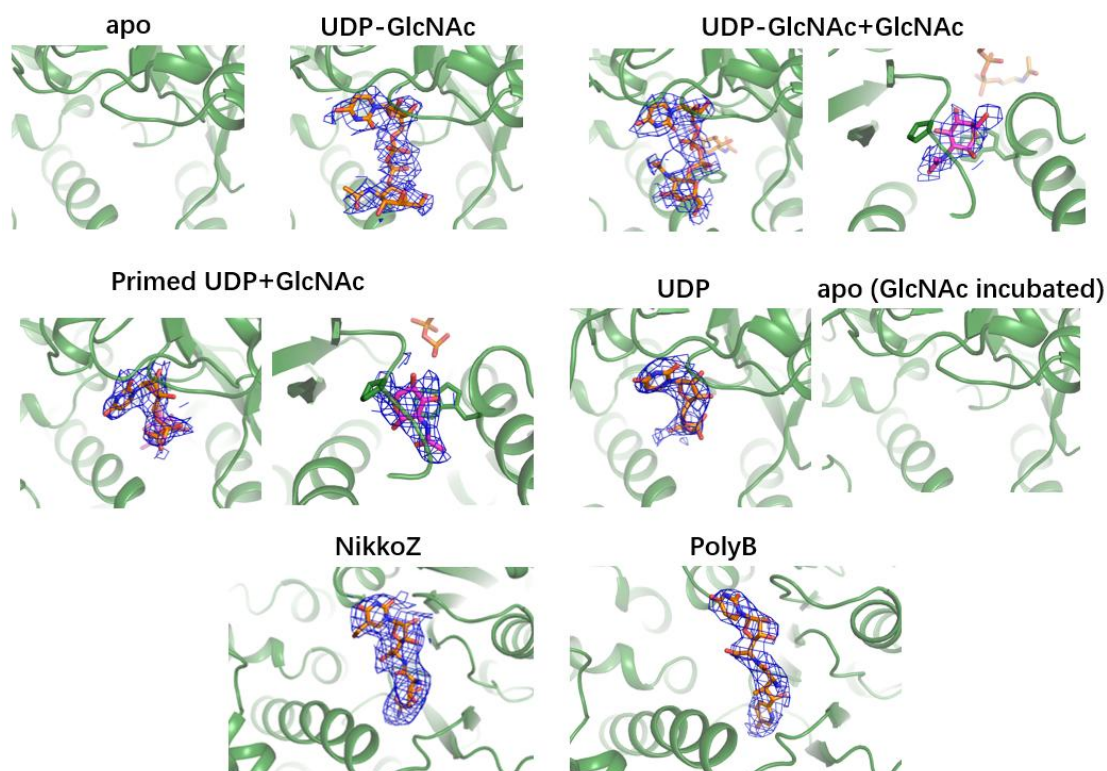

**Supplementary Figure 13. Cryo-EM densities of substrates in structures of Chs1 in apo, UDP-GlcNAc bound, UDP+GlcNAc bound (primed), UDP-GlcNAc+GlcNAc bound, UDP bound, apo (GlcNAc incubated), NikkoZ bound, and PolyB bound states.** The structure of Chs1 is shown as a green cartoon. UDP-GlcNAc, UDP, and inhibitors are shown as orange sticks. The GlcNAc acceptor is shown as purple sticks.  $Mg^{2+}$  molecules are in lime spheres.





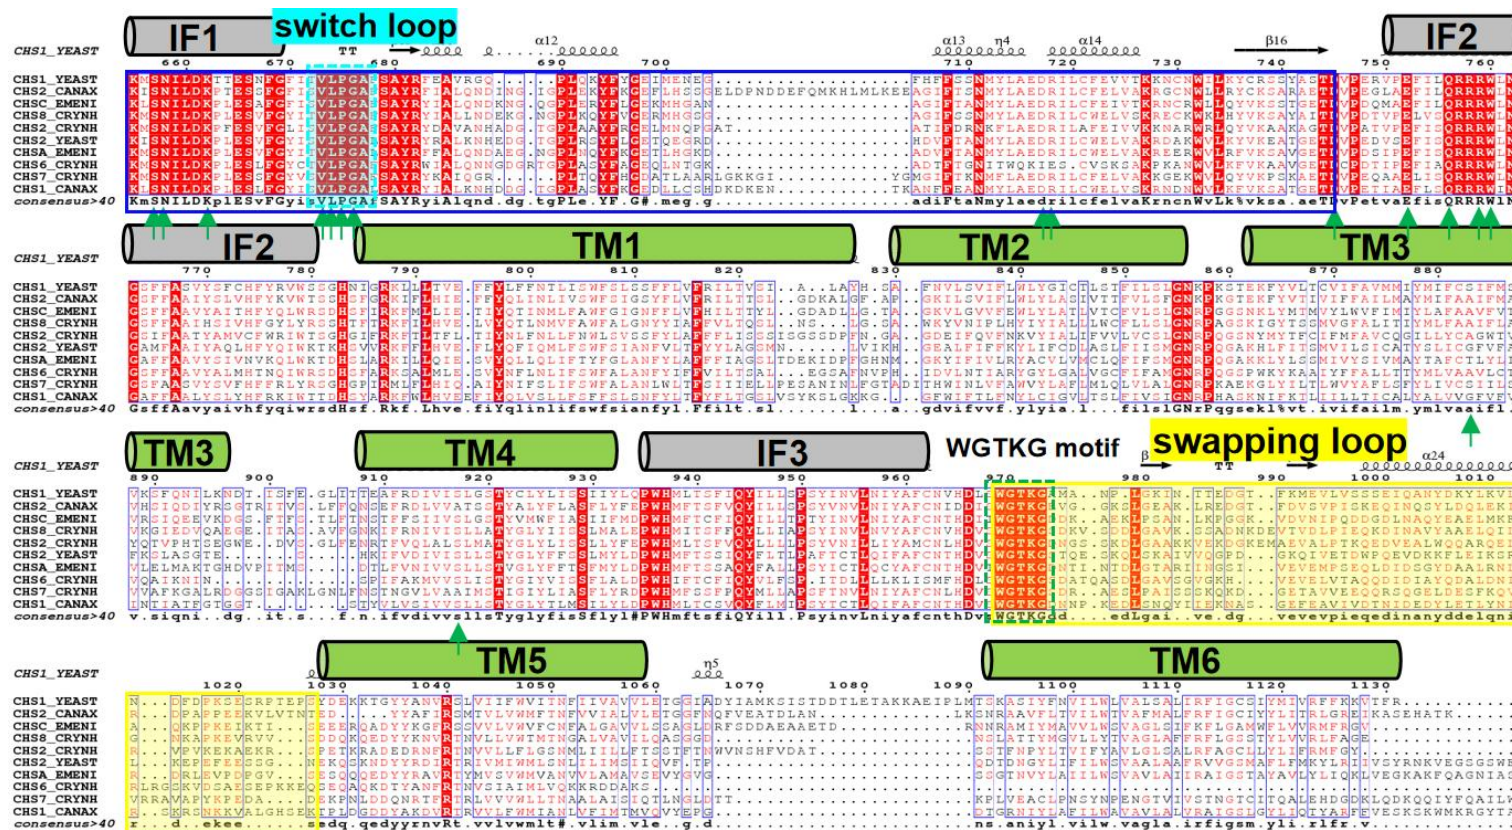

**Supplementary Figure 14. Sequence alignment of chitin synthase genes from different fungal species.** YEAST: *Saccharomyces cerevisiae*, CANAX: *Candida albicans*, EMENI: *Emericella nidulans*, CRYNH: *Cryptococcus neoformans*. GTD is highlighted by a blue rectangle. Transmembrane helices are highlighted by green cylinders according to our Chs1 structure. Interface helices (IF1–3) are highlighted by black or gray cylinders. The switch loop, domain swapping loop, and WGTKG motif are highlighted by cyan, yellow, and green rectangles respectively. Green arrows indicate key residues in the active site and transporting channel.

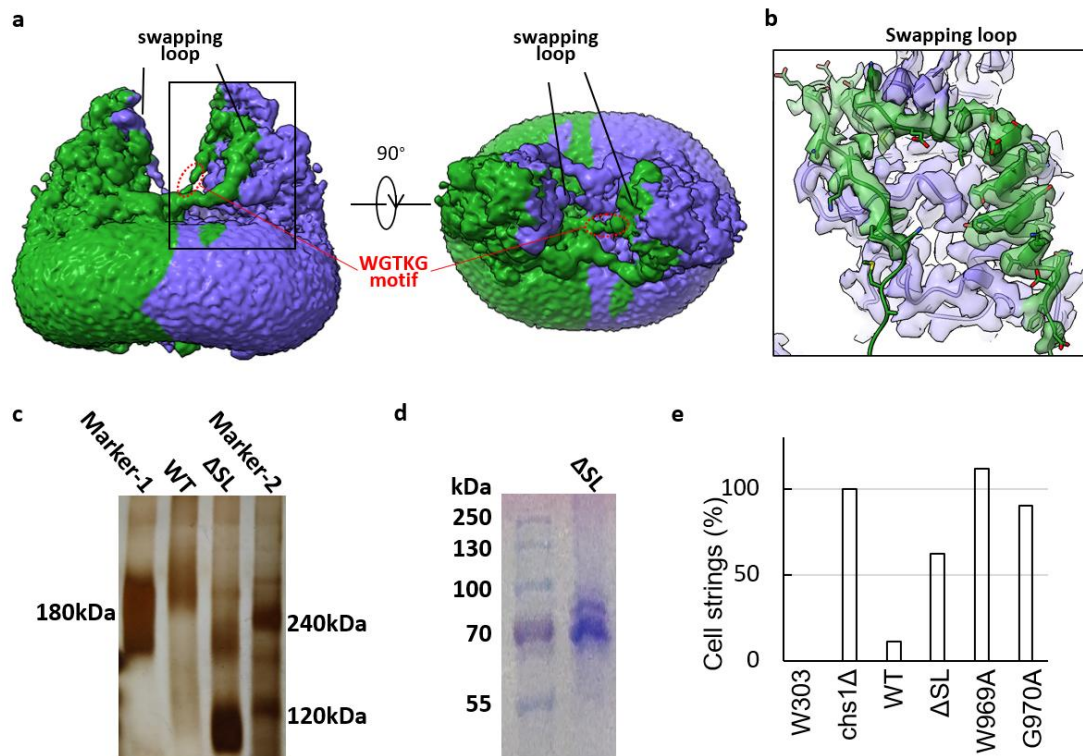

**Supplementary Figure 15. Characterization of the swapping loop.** **a)** Unsharpened map of apo Chs1 is shown at a lower display threshold to show the weaker density. Location of WGTKG motif was highlighted by red ovals. Location of the swapping loops are labeled. The swapping loop of one subunit was highlighted by a black rectangle. **b)** An enlarged view of the region in the red box in (a). **c)** Purified swapping loop truncated Chs1 ( $\Delta$  SL) was checked by native-PAGE gel with wild type Chs1 (WT) and two markers as references. Source data is provided as a Source Data file. Three independent experiments were conducted with similar results. **d)** Purified  $\Delta$  SL was checked by Coomassie blue-stained SDS-PAGE gel. Source data is provided as a Source Data file. Three independent experiments were conducted with similar results. **e)** Growth complementation of wild-type w303 cells (w303) and  $chs1 \Delta$  cells with empty plasmid ( $chs1 \Delta$ ) or plasmid carrying either wild-type Chs1 (WT) or mutants ( $\Delta$  SL, W969A and G970A). Representative cell images are shown in **Supplementary Fig. 15**. Cell string refers to a string of unseparated cells with number  $\geq 3$ . For each of these strains, >2000 cells were counted and calculated using w303 and  $chs1 \Delta$  as negative and positive controls. The phenotype of the cell string is an indicator of how much Chs1's function is disrupted in vivo.



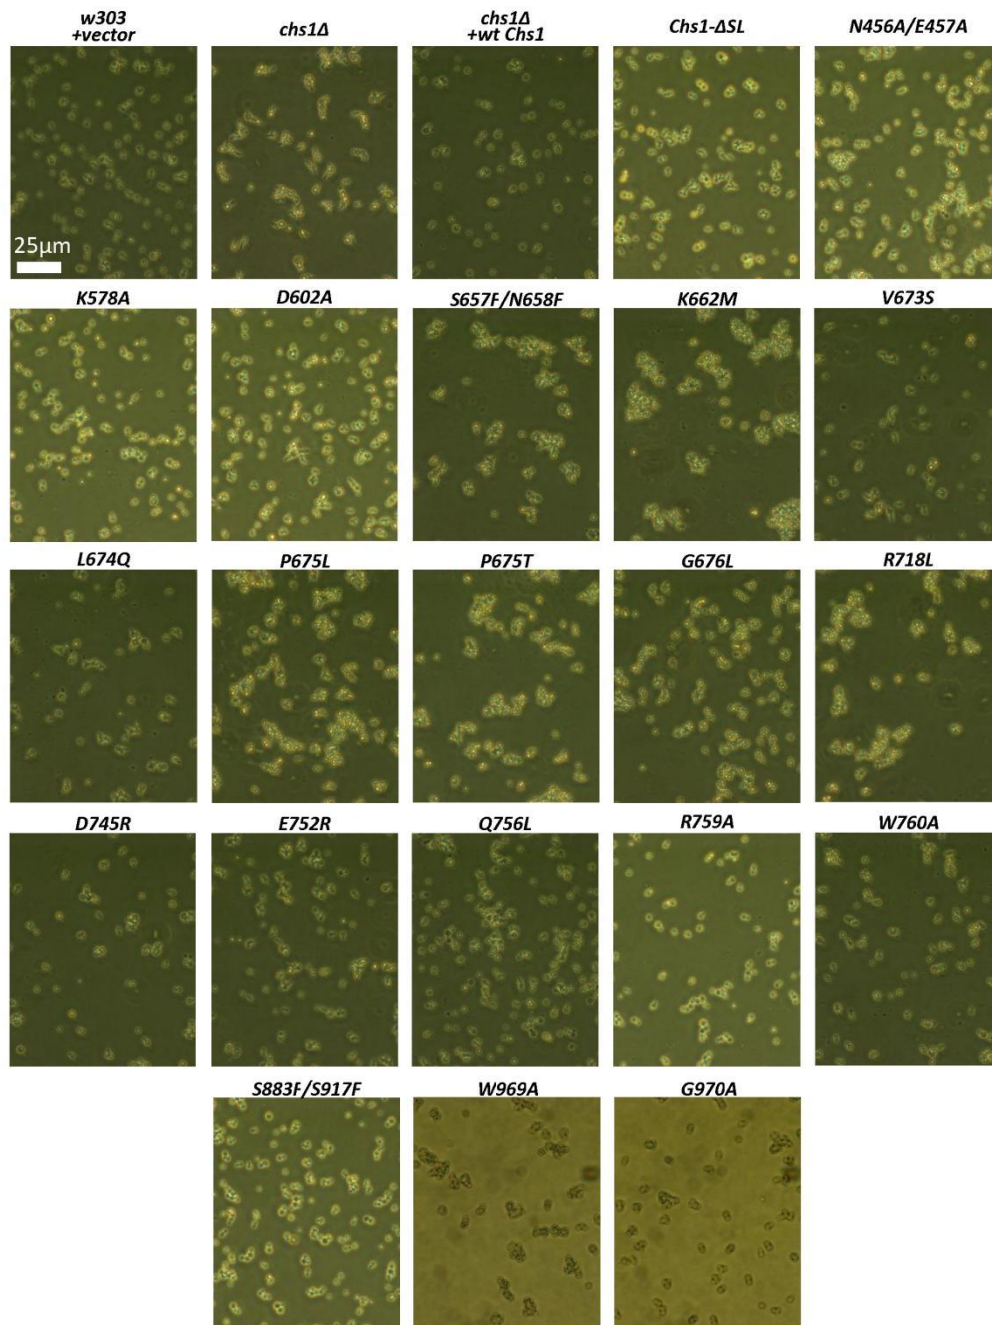

**Supplementary Figure 16. Growth complementation of wild-type w303 cells with empty plasmid (w303+vector) and *chs1*Δ cells with empty plasmid (*chs1*Δ) or plasmid carrying either wild-type Chs1 (*chs1*Δ+wt Chs1) or mutants.** Cell images were captured when cells grew to OD=1. The phenotype of the cell string is an indicator of how much Chs1's function is disrupted in vivo. Three independent experiments were conducted with similar results.

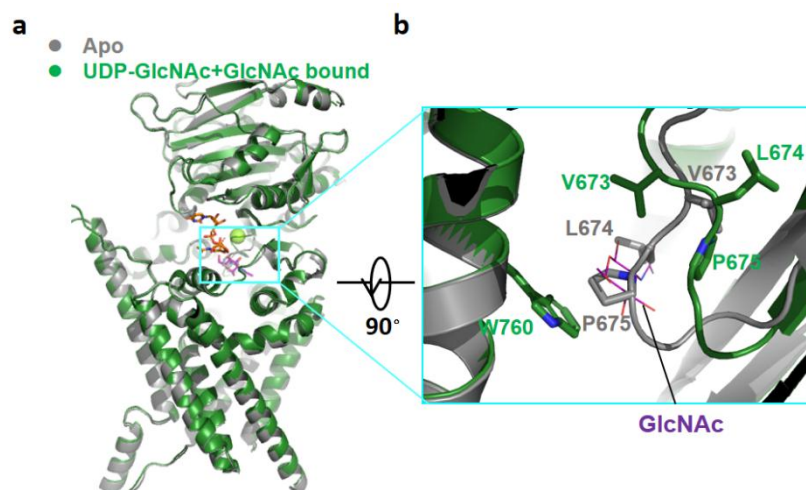

**Supplementary Figure 17. Structural superposition between Chs1 in the apo state (gray) and UDP-GlcNAc+GlcNAc-bound state (green).** **a)** Overall structure of apo Chs1 and UDP-GlcNAc+GlcNAc bound Chs1 in cartoon. The active site is highlighted by a cyan box. **b)** Enlargement of the cyan box region in (a) viewed from cytosolic side. GlcNAc acceptor (purple) is shown in line. W760 and residues of switch loop are shown in stick. Side chains of V673, L674, and P675 in two states face opposite orientations.

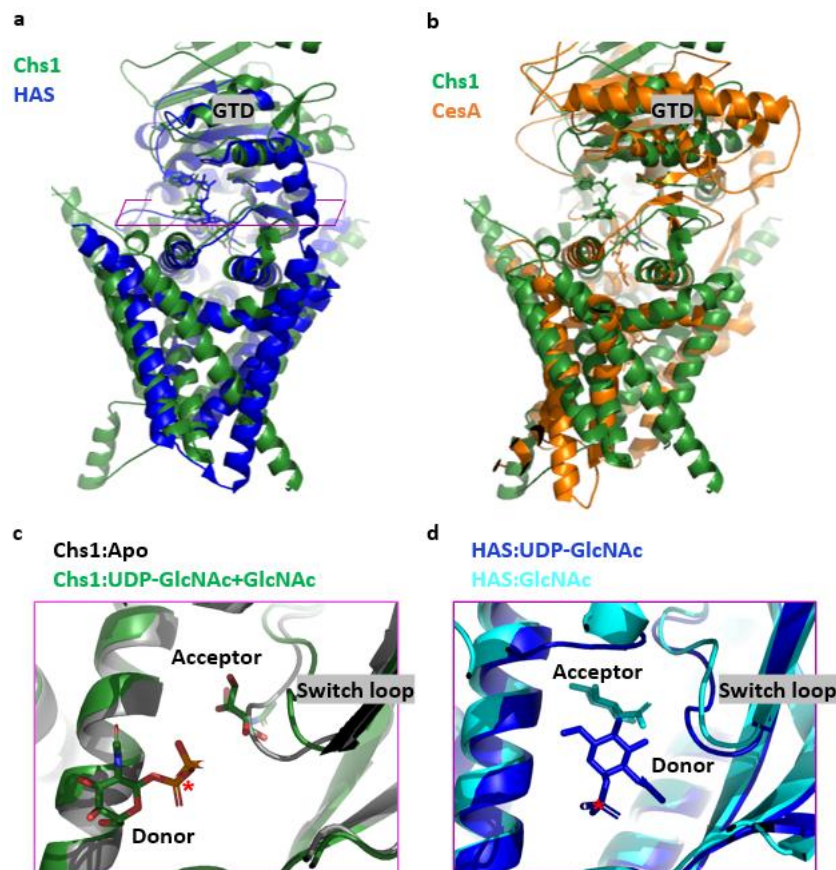

**Supplementary Figure 18. Structural comparison between Chs1 and a hyaluronan synthase (HAS) and a cellulose synthase (CesA) by aligning their respective TMs.** **a)** Structural comparison between UDP-GlcNAc+GlcNAc bound Chs1 (green) and UDP-GlcNAc bound HAS (PDB ID: 7SP8, blue) by aligning their respective TMs. The purple rhomboid mark the position for cut-in view shown in panels **c** and **d**. **b)** Structural comparison between UDP-GlcNAc+GlcNAc bound Chs1 (green) and cellulose bound CesA (PDB ID: 7D5K, orange) by aligning their respective TMs. **c)** A cut-in view from the cytosolic side of the superposition of Chs1 in the apo state (gray) and UDP-GlcNAc+GlcNAc bound state (green). The switch loop is shifted by  $\sim 4$  Å. The GlcNAc moiety of UDP-GlcNAc faces outside, and the  $\beta$ -phosphate is highlighted by a red star. **d)** A cut-in view from the cytosolic side of the superposition of HAS in the UDP-GlcNAc bound state (blue) and GlcNAc bound state (cyan). The switch loop only shifted slightly upon UDP-GlcNAc hydrolysis in HAS. The GlcNAc moiety of UDP-GlcNAc in the HAS structure faces inside, and the  $\beta$ -phosphate is highlighted by a red star.



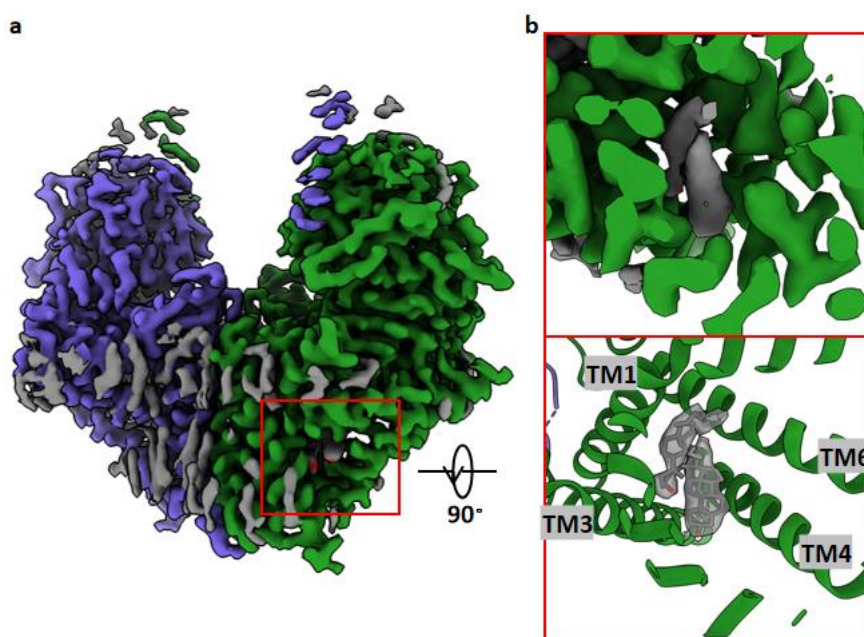

**Supplementary Figure 19. Lateral opening of Chs1 is occupied by two sterol molecules.** **a)** Overall map of Chs1. The lateral opening in the membrane region is highlighted by a red box. **b)** An enlarged view of the region in the red box in panel A rotated by 90°.
